# Supplementary material
Source: HighWire-hosted journal article supplement (http://www.cmaj.ca/highwire/filestream/58660/field_highwire_adjunct_files/0/limit-good-1-at.pdf)
Supplement: limit-good-1-at.pdf [file limit-good-1-at.pdf]

**Appendix 1 (as supplied by the authors): Selected conditions for this analysis and their ICD-10 definitions**

| Condition                                           | Definition                                                                                         |
|-----------------------------------------------------|----------------------------------------------------------------------------------------------------|
| Musculoskeletal                                     | Any ICD-10 classification starting with “M”                                                        |
| Cardio/cerebro-vascular                             | Any ICD-10 classification starting with “I”                                                        |
| Mental health                                       | Any ICD-10 classification starting with “F”                                                        |
| Neurological                                        | Any ICD-10 classification starting with “G”                                                        |
| Endocrine                                           | Any ICD-10 classification starting with “E”                                                        |
| Respiratory                                         | Any ICD-10 classification starting with “J”<br>ICD-10 codes “R060”, “R068”, “R942”, “A169”         |
| Cancer                                              | Any ICD-10 classification starting with “C”<br>ICD-10 codes “D381”, “D432”, “D443”, “D480”, “D489” |
| Digestive                                           | Any ICD-10 classification starting with “K”                                                        |
| Renal-genital                                       | Any ICD-10 classification starting with “N”                                                        |
| Congenital                                          | Any ICD-10 classification starting with “Q”                                                        |
| Dermatological                                      | Any ICD-10 classification starting with “L”                                                        |
| Other (injury, falls, poisoning, exposure, vehicle) | Any ICD-10 classification starting with “S”, “T”, “V”, “X”                                         |
